# Supplementary material for: Growth and Primary Metabolism of Lettuce Seedlings (Lactuca sativa L.) Are Promoted by an Innovative Iron-Based Fenton Composted Amendment
Source: Preprints.org preprint supplement (doi:10.20944/preprints202306.0347.v1), 2023-06-05
Supplement: Supplementary file 1 [file supplementary]

**"Research paper:** Growth and primary metabolism of lettuce seedlings (*Lactuca sativa* L.) are promoted by an innovative Iron-Based Fenton composted amendment.  
Amalia Piro, Daniela Oliva, Dante Matteo Nisticò, Ilaria Lania, Maria Rita Basile, Giuseppe Chidichimo, Silvia Mazzuca"

**Supplementary table 6a.** KEGG enrichment analysis of DAPs in roots of *Lactuca sativa* seedlings after treatment with FCA

| Query                       | KO     | Definition                                                                                                                |
|-----------------------------|--------|---------------------------------------------------------------------------------------------------------------------------|
| sp O64989 C90B1_ARATH (513) | K09587 | CYP90B, DWF4; steroid 22S-hydroxylase [EC:1.14.14.178]                                                                    |
| sp Q3MV14 DSE1_ARATH (386)  | K24770 | DSE1, ALT2, EMB2757; protein decreased size exclusion limit 1                                                             |
| sp Q6F3F1 METK4_ATRNU (396) | K00789 | metK, MAT; S-adenosylmethionine synthetase [EC:2.5.1.6]                                                                   |
| sp Q9SCY2 FKB13_ARATH (208) | K01802 | E5.2.1.8; peptidylprolyl isomerase [EC:5.2.1.8]                                                                           |
| sp Q8RXG3 M2K5_ARATH (348)  | K13413 | MKK4_5; mitogen-activated protein kinase kinase 4/5 [EC:2.7.12.2]                                                         |
| sp Q9XIF2 MTR4_ARATH (988)  | K12598 | MTR4, SKIV2L2; ATP-dependent RNA helicase DOB1 [EC:3.6.4.13]                                                              |
| sp Q9FX68 ZWIP6_ARATH (302) |        |                                                                                                                           |
| sp Q8RWH9 NUP58_ARATH (513) | K14307 | NUPL1, NUP49; nucleoporin p58/p45                                                                                         |
| sp Q9SLK2 ALIS3_ARATH (349) |        |                                                                                                                           |
| sp Q5K4R0 MAD47_ORYSJ (250) |        |                                                                                                                           |
| sp Q9FME5 COBL5_ARATH (204) |        |                                                                                                                           |
| sp Q96552 METK2_CATRO (393) | K00789 | metK, MAT; S-adenosylmethionine synthetase [EC:2.5.1.6]                                                                   |
| sp Q9LNQ1 TI231_ARATH (187) | K17794 | TIM23; mitochondrial import inner membrane translocase subunit TIM23                                                      |
| sp Q8GYT9 SIS3_ARATH (358)  | K16284 | SIS3; E3 ubiquitin-protein ligase SIS3 [EC:2.3.2.27]                                                                      |
| sp Q9CA93 BAC2_ARATH (296)  | K15109 | SLC25A20_29, CACT, CACL, CRC1; solute carrier family 25 (mitochondrial carnitine/acylcarnitine transporter), member 20/29 |
| sp Q38841 AGL12_ARATH (211) |        |                                                                                                                           |
| sp Q84WW2 6PGL3_ARATH (325) | K01057 | PGLS, pgl, devB; 6-phosphogluconolactonase [EC:3.1.1.31]                                                                  |
| sp Q6NKU9 TI223_ARATH (214) | K17790 | TIM22; mitochondrial import inner membrane translocase subunit TIM22                                                      |
| sp Q9SJQ1 PXC1_ARATH (672)  |        |                                                                                                                           |
| sp Q5H8A6 CASTO_LOTJA (853) | K21866 | POLLUX, DMI1, CASTOR; ion channel POLLUX/CASTOR                                                                           |
| sp O23254 GLYC4_ARATH (471) | K00600 | glyA, SHMT; glycine hydroxymethyltransferase [EC:2.1.2.1]                                                                 |

|                                 |            |                                                                                                    |
|---------------------------------|------------|----------------------------------------------------------------------------------------------------|
| sp Q96551 METK1_CATRO<br>(393)  | K007<br>89 | metK, MAT; S-adenosylmethionine synthetase [EC:2.5.1.6]                                            |
| sp P13868 CALM1_SOLTU<br>(149)  | K021<br>83 | CALM; calmodulin                                                                                   |
| sp Q9STE8 TC753_ARATH<br>(818)  |            |                                                                                                    |
| sp Q9LIK0 PKP1_ARATH<br>(596)   | K008<br>73 | PK, pyk; pyruvate kinase [EC:2.7.1.40]                                                             |
| sp Q8L7W2 NUDT8_ARATH<br>(369)  |            |                                                                                                    |
| sp Q94A28 ACO2M_ARATH<br>(995)  | K016<br>81 | ACO, acnA; aconitate hydratase [EC:4.2.1.3]                                                        |
| sp Q67Z52 TBCB_ARATH<br>(243)   | K172<br>62 | TBCB, CKAP1, ALF1; tubulin-specific chaperone B                                                    |
| sp O24520 HBL1_ARATH<br>(160)   |            |                                                                                                    |
| sp Q9ZT81 CSPLK_ARATH<br>(164)  |            |                                                                                                    |
| sp Q37001 1A15_ARATH<br>(470)   | K017<br>62 | ACS; 1-aminocyclopropane-1-carboxylate synthase [EC:4.4.1.14]                                      |
| sp Q9LE81 IRE_ARATH<br>(1168)   |            |                                                                                                    |
| sp Q9AVJ9 MXMT1_COFAR<br>(378)  | K214<br>82 | BAMT; benzoate O-methyltransferase [EC:2.1.1.273]                                                  |
| sp Q5W7C1 STAR2_ORYSJ<br>(285)  | K020<br>69 | STAR2, fetB; UDP-glucose/iron transport system permease protein                                    |
| sp Q9S7Z3 PCS1_ARATH<br>(485)   | K059<br>41 | E2.3.2.15; glutathione gamma-glutamylcysteinyltransferase [EC:2.3.2.15]                            |
|                                 | K255<br>87 | E3.4.17.25; glutathione-S-conjugate glycine hydrolase [EC:3.4.17.25]                               |
| sp Q9LSF6 VTH21_ARATH<br>(219)  | K227<br>36 | VIT; vacuolar iron transporter family protein                                                      |
| sp Q766Z3 REV3_ARATH<br>(1890)  | K023<br>50 | REV3L, POLZ; DNA polymerase zeta [EC:2.7.7.7]                                                      |
| sp Q8S8S1 PEX16_ARATH<br>(367)  | K133<br>35 | PEX16; peroxin-16                                                                                  |
| sp O24379 LOX12_SOLTU<br>(861)  | K157<br>18 | LOX1_5; linoleate 9S-lipoxygenase [EC:1.13.11.58]                                                  |
| sp B9G5Y5 AB25G_ORYSJ<br>(1004) |            |                                                                                                    |
| sp O49485 SERA1_ARATH<br>(603)  | K000<br>58 | serA, PHGDH; D-3-phosphoglycerate dehydrogenase / 2-oxoglutarate reductase [EC:1.1.1.95 1.1.1.399] |
| sp Q8RXE1 GAUT5_ARATH<br>(610)  | K136<br>48 | GAUT; alpha-1,4-galacturonosyltransferase [EC:2.4.1.43]                                            |
| sp O23180 PLP5_ARATH<br>(414)   |            |                                                                                                    |
| sp Q0WQG8 GTG2_ARATH<br>(467)   |            |                                                                                                    |
| sp P43281 METK2_SOLLC<br>(393)  | K007<br>89 | metK, MAT; S-adenosylmethionine synthetase [EC:2.5.1.6]                                            |
| sp Q8LDP4 CP19D_ARATH<br>(201)  | K018<br>02 | E5.2.1.8; peptidylprolyl isomerase [EC:5.2.1.8]                                                    |

|                             |        |                                                                                      |
|-----------------------------|--------|--------------------------------------------------------------------------------------|
| sp P22221 PPDK_FLATR (953)  | K01006 | ppdK; pyruvate, orthophosphate dikinase [EC:2.7.9.1]                                 |
| sp O04089 ZIP4_ARATH (374)  | K14709 | SLC39A1_2_3, ZIP1_2_3; solute carrier family 39 (zinc transporter), member 1/2/3     |
| sp Q9LZW4 CIPKE_ARATH (442) |        |                                                                                      |
| sp Q7XZR1 METK1_ATRNU (396) | K00789 | metK, MAT; S-adenosylmethionine synthetase [EC:2.5.1.6]                              |
| sp Q652K1 SGR_ORYSJ (274)   | K22013 | SGR, SGRL; magnesium dechelataase [EC:4.99.1.10]                                     |
| sp Q9LDM2 CER7L_ARATH (307) | K03678 | RRP45, EXOSC9; exosome complex component RRP45                                       |
| sp Q10MI0 SRL2_ORYSJ (988)  | K21842 | EFR3; protein EFR3                                                                   |
| sp Q9LMA7 CXE1_ARATH (318)  |        |                                                                                      |
| sp Q9AST8 ROSY1_ARATH (160) |        |                                                                                      |
| sp Q9CAU2 SCP5_ARATH (438)  | K16296 | SCPL-I; serine carboxypeptidase-like clade I [EC:3.4.16.-]                           |
| sp Q5GHF7 IPT_HUMLU (329)   | K10760 | IPT; adenylate dimethylallyltransferase (cytokinin synthase) [EC:2.5.1.27 2.5.1.112] |
| sp Q9SEZ1 ZHD11_ARATH (242) |        |                                                                                      |
| sp Q9LW00 MBD11_ARATH (254) |        |                                                                                      |
| sp H6WS93 PDR1_PETAX (1452) | K08711 | PDR, CDR1; ATP-binding cassette, subfamily G (WHITE), member 2, PDR                  |
| sp Q9LFS4 NIK1_ARATH (638)  |        |                                                                                      |
| sp Q6XMI3 BSMT1_ARATH (379) | K21483 | SAMT; salicylate 1-O-methyltransferase [EC:2.1.1.274]                                |
| sp Q0WQF4 VP53A_ARATH (828) | K20299 | VPS53; vacuolar protein sorting-associated protein 53                                |
| sp Q9SN68 RAF2B_ARATH (200) | K07889 | RAB5C; Ras-related protein Rab-5C                                                    |
| sp Q949P1 ABAH1_ARATH (467) | K09843 | CYP707A; (+)-abscisic acid 8'-hydroxylase [EC:1.14.14.137]                           |
| sp O65530 PEK14_ARATH (731) |        |                                                                                      |
| sp Q06611 PIP12_ARATH (286) | K09872 | PIP; aquaporin PIP                                                                   |
| sp Q69XJ0 SPX1_ORYSJ (295)  |        |                                                                                      |
| sp Q9ZWS9 ARR3_ARATH (231)  | K14492 | ARR-A; two-component response regulator ARR-A family                                 |
| sp Q9FUY7 C79F2_ARATH (537) |        |                                                                                      |
| sp Q94C74 GLYM2_ARATH (517) | K00600 | glyA, SHMT; glycine hydroxymethyltransferase [EC:2.1.2.1]                            |
| sp O82345 BAG6_ARATH (1043) |        |                                                                                      |

|                                     |            |                                                                                |
|-------------------------------------|------------|--------------------------------------------------------------------------------|
| sp P17784 ALFC1_ORYSJ<br>(358)      | K016<br>23 | ALDO; fructose-bisphosphate aldolase, class I [EC:4.1.2.13]                    |
| sp Q06197 IDHC_SOYBN<br>(413)       | K000<br>31 | IDH1, IDH2, icd; isocitrate dehydrogenase [EC:1.1.1.42]                        |
| sp P53392 SUT2_STYHA<br>(662)       | K174<br>70 | SULTR1; sulfate transporter 1, high-affinity                                   |
| sp Q7XHW5 C14B1_ORYSJ<br>(534)      | K206<br>61 | CYP714A1; cytochrome P450 family 714 subfamily A1                              |
| sp Q0WT24 STOP2_ARATH<br>(373)      |            |                                                                                |
| sp Q6ZIB5 PIN5C_ORYSJ<br>(370)      | K139<br>47 | PIN; auxin efflux carrier family protein                                       |
| sp Q8S341 PPA7_ARATH<br>(328)       | K143<br>79 | ACP5; tartrate-resistant acid phosphatase type 5 [EC:3.1.3.2]                  |
| sp Q1H595 LSM2_ARATH<br>(93)        | K126<br>21 | LSM2; U6 snRNA-associated Sm-like protein LSM2                                 |
| sp Q84S07 NIP33_ORYSJ<br>(278)      | K098<br>74 | NIP; aquaporin NIP                                                             |
| sp Q94A57 PHL2_ARATH<br>(295)       |            |                                                                                |
| sp Q852M4 PLAT3_ORYSJ<br>(749)      | K013<br>01 | NAALAD; N-acetylated-alpha-linked acidic dipeptidase [EC:3.4.17.21]            |
| sp Q8S397 NHX4_ARATH<br>(529)       |            |                                                                                |
| sp Q9SXF8 PIP13_ORYSJ<br>(288)      | K098<br>72 | PIP; aquaporin PIP                                                             |
| sp A8MRY9 UGNT1_ARATH<br>(344)      | K152<br>81 | SLC35D1_2_3; solute carrier family 35, member D1/2/3                           |
| sp Q37145 ACA1_ARATH<br>(1020)      | K015<br>37 | ATP2C; P-type Ca <sup>2+</sup> transporter type 2C [EC:7.2.2.10]               |
| sp A0A1D6HQ92 YCED1_MAI<br>ZE (293) |            |                                                                                |
| sp Q0D9R7 ARFS_ORYSJ<br>(1161)      |            |                                                                                |
| sp Q9SFU3 PPA15_ARATH<br>(532)      | K223<br>90 | ACP7; acid phosphatase type 7                                                  |
| sp Q9XFR0 KCO3_ARATH<br>(260)       | K053<br>89 | KCNKF; potassium channel subfamily K, other eukaryote                          |
| sp P04770 GLNA1_PHAVU<br>(356)      | K019<br>15 | glNA, GLUL; glutamine synthetase [EC:6.3.1.2]                                  |
| sp Q93Z81 CAX3_ARATH<br>(459)       | K073<br>00 | chaA, CAX; Ca <sup>2+</sup> :H <sup>+</sup> antiporter                         |
| sp Q50LH3 C7192_ESCCA<br>(495)      | K097<br>54 | CYP98A, C3'H; 5-O-(4-coumaroyl)-D-quinic acid 3'-monooxygenase [EC:1.14.14.96] |
| sp Q94A16 CP21C_ARATH<br>(230)      |            |                                                                                |
| sp Q94FA5 METK4_BRAJU<br>(390)      | K007<br>89 | metK, MAT; S-adenosylmethionine synthetase [EC:2.5.1.6]                        |
| sp Q945Q1 CYT1_ARATH<br>(101)       |            |                                                                                |
| sp Q8H0V4 DUF7_ARATH<br>(722)       |            |                                                                                |

|                                      |        |                                                                              |
|--------------------------------------|--------|------------------------------------------------------------------------------|
| sp Q8GVE8 CAPP4_ARATH (1032)         | K01595 | ppc; phosphoenolpyruvate carboxylase [EC:4.1.1.31]                           |
| sp Q9FMF5 RPT3_ARATH (746)           |        |                                                                              |
| sp P43282 METK3_SOLLC (390)          | K00789 | metK, MAT; S-adenosylmethionine synthetase [EC:2.5.1.6]                      |
| sp Q40872 AG_PANGI (242)             | K09264 | K09264; MADS-box transcription factor, plant                                 |
| sp Q9FMS7 OFP10_ARATH (196)          |        |                                                                              |
| sp Q08062 MDHC_MAIZE (332)           | K00025 | MDH1; malate dehydrogenase [EC:1.1.1.37]                                     |
| sp O81001 GRF1_ARATH (530)           |        |                                                                              |
| sp Q8GXJ4 GLR34_ARATH (959)          | K05387 | GRIP; glutamate receptor, ionotropic, plant                                  |
| sp Q9FFN7 DGK2_ARATH (712)           | K00901 | dgkA, DGK; diacylglycerol kinase (ATP) [EC:2.7.1.107]                        |
| sp Q7XSQ9 PIP12_ORYSJ (288)          | K09872 | PIP; aquaporin PIP                                                           |
| tr L0GDQ5 L0GDQ5_WHEAT (262)         | K06630 | YWHAE; 14-3-3 protein epsilon                                                |
| tr A0A0U2WTZ1 A0A0U2WTZ1_PRUAV (290) | K09872 | PIP; aquaporin PIP                                                           |
| sp Q96293 ACT8_ARATH (377)           | K10355 | ACTF; actin, other eukaryote                                                 |
| tr A0A178WDV5 A0A178WDV5_ARATH (377) | K10355 | ACTF; actin, other eukaryote                                                 |
| tr A0A140JW78 A0A140JW78_9GENT (304) | K09422 | MYBP; transcription factor MYB, plant                                        |
| sp Q9LHJ9 P2C38_ARATH (385)          | K01102 | PDP; pyruvate dehydrogenase phosphatase [EC:3.1.3.43]                        |
| tr B9DH70 B9DH70_ARATH (337)         |        |                                                                              |
| tr B6TD48 B6TD48_MAIZE (307)         | K00472 | P4HA; prolyl 4-hydroxylase [EC:1.14.11.2]                                    |
| tr A5YM78 A5YM78_CICAR (261)         | K06630 | YWHAE; 14-3-3 protein epsilon                                                |
| tr Q0WTE4 Q0WTE4_ARATH (186)         | K08515 | VAMP7; vesicle-associated membrane protein 7                                 |
| tr Q705X3 Q705X3_MEDTR (233)         | K12462 | ARHGDI, RHOGDI; Rho GDP-dissociation inhibitor                               |
| tr Q7Y0W8 Q7Y0W8_LUPAL (412)         | K00031 | IDH1, IDH2, icd; isocitrate dehydrogenase [EC:1.1.1.42]                      |
| tr Q9XGB4 Q9XGB4_TRIRP (298)         | K01183 | E3.2.1.14; chitinase [EC:3.2.1.14]                                           |
| tr A0A2K8GLT3 A0A2K8GLT3_LUPAL (487) | K03327 | TC.MATE, SLC47A, norM, mdtK, dinF; multidrug resistance protein, MATE family |
| tr F8WL60 F8WL60_RHISY (297)         | K10355 | ACTF; actin, other eukaryote                                                 |
| tr A0A1U8YLW4 A0A1U8YLW4_VIGUN (289) | K09872 | PIP; aquaporin PIP                                                           |

|                                      |        |                                                                                                             |
|--------------------------------------|--------|-------------------------------------------------------------------------------------------------------------|
| tr A0A076V5N5 A0A076V5N5_9APIA (509) | K00938 | E2.7.4.2, mvaK2; phosphomevalonate kinase [EC:2.7.4.2]                                                      |
| tr B2L2W9 B2L2W9_9SOLA (260)         | K08081 | TR1; tropinone reductase I [EC:1.1.1.206]                                                                   |
| tr A0A1U8YLV7 A0A1U8YLV7_VIGUN (289) | K09872 | PIP; aquaporin PIP                                                                                          |
| tr Q9SAZ6 Q9SAZ6_MAIZE (960)         | K01595 | ppc; phosphoenolpyruvate carboxylase [EC:4.1.1.31]                                                          |
| tr I3NN78 I3NN78_SOLLC (310)         |        |                                                                                                             |
| tr V5RDW6 V5RDW6_CUCSA (292)         | K09872 | PIP; aquaporin PIP                                                                                          |
| tr L7NJI5 L7NJI5_GOSBA (267)         | K01183 | E3.2.1.14; chitinase [EC:3.2.1.14]                                                                          |
| tr C0Z2S6 C0Z2S6_ARATH (325)         | K13260 | CYP81E; isoflavone/4'-methoxyisoflavone 2'-hydroxylase [EC:1.14.14.90 1.14.14.89]                           |
| tr B2ZUU2 B2ZUU2_LOTJA (516)         |        |                                                                                                             |
| tr A0A2Z5EMU8 A0A2Z5EMU8_ORYSI (568) |        |                                                                                                             |
| tr A0A0D5W5Q1 A0A0D5W5Q1_9ROSI (287) | K09872 | PIP; aquaporin PIP                                                                                          |
| tr M4M6J9 M4M6J9_TRIRP (182)         |        |                                                                                                             |
| sp Q42908 PMGI_MESCR (559)           | K15633 | gpml; 2,3-bisphosphoglycerate-independent phosphoglycerate mutase [EC:5.4.2.12]                             |
| sp P14654 GLN12_ORYSJ (357)          | K01915 | glnA, GLUL; glutamine synthetase [EC:6.3.1.2]                                                               |
| tr C5G5Y5 C5G5Y5_PHAAN (301)         | K08235 | E2.4.1.207; xyloglucan:xyloglucosyl transferase [EC:2.4.1.207]                                              |
| tr O22339 O22339_MEDSA (290)         | K09872 | PIP; aquaporin PIP                                                                                          |
| tr Q3T1V7 Q3T1V7_9LILI (517)         | K20000 | MATK; maturase K                                                                                            |
| sp Q42899 GLNA1_LOTJA (356)          | K01915 | glnA, GLUL; glutamine synthetase [EC:6.3.1.2]                                                               |
| tr B6SM21 B6SM21_MAIZE (330)         | K08064 | NFYA, HAP2; nuclear transcription factor Y, alpha                                                           |
| sp Q10M12 40C1_ORYSJ (348)           |        |                                                                                                             |
| tr M1EY53 M1EY53_9ROSI (281)         | K09872 | PIP; aquaporin PIP                                                                                          |
| sp P42895 ENO2_MAIZE (446)           | K01689 | ENO, eno; enolase [EC:4.2.1.11]                                                                             |
| tr Q41730 Q41730_MAIZE (169)         |        |                                                                                                             |
| tr Q1H8M9 Q1H8M9_BETVU (290)         |        |                                                                                                             |
| tr H2BPE1 H2BPE1_9MONI (427)         | K02112 | ATPF1B, atpD; F-type H <sup>+</sup> /Na <sup>+</sup> -transporting ATPase subunit beta [EC:7.1.2.2 7.2.2.1] |
| tr A0A804J464 A0A804J464_MUSAM (386) | K05605 | HIBCH; 3-hydroxyisobutyryl-CoA hydrolase [EC:3.1.2.4]                                                       |

|                                       |        |                                                                                                         |
|---------------------------------------|--------|---------------------------------------------------------------------------------------------------------|
| tr I1SUZ0 I1SUZ0_CICAR (261)          | K06630 | YWHAE; 14-3-3 protein epsilon                                                                           |
| tr T1R3E6 T1R3E6_DATGL (187)          |        |                                                                                                         |
| tr A0A075EC73 A0A075EC73_ASTME (571)  | K00021 | HMGCR; hydroxymethylglutaryl-CoA reductase (NADPH) [EC:1.1.1.34]                                        |
| tr A0A2H4RK81 A0A2H4RK81_9ERIC (1223) |        |                                                                                                         |
| tr Q5KTN5 Q5KTN5_TOBAC (260)          | K06630 | YWHAE; 14-3-3 protein epsilon                                                                           |
| tr L0GED8 L0GED8_WHEAT (261)          | K06630 | YWHAE; 14-3-3 protein epsilon                                                                           |
| tr L7X5Z3 L7X5Z3_GOSHI (246)          |        |                                                                                                         |
| XP_009387221.1 (277)                  | K08150 | SLC2A13, ITR; MFS transporter, SP family, solute carrier family 2 (myo-inositol transporter), member 13 |
| XP_018677474.1 (264)                  | K13066 | COMT; caffeic acid 3-O-methyltransferase / acetylserotonin O-methyltransferase [EC:2.1.1.68 2.1.1.4]    |
| XP_018673750.1 (335)                  | K13356 | FAR; alcohol-forming fatty acyl-CoA reductase [EC:1.2.1.84]                                             |

**"Research paper:** Growth and primary metabolism of lettuce seedlings (*Lactuca sativa* L.) are promoted by an innovative Iron-Based Fenton composted amendment.

Amalia Piro, Daniela Oliva, Dante Matteo Nisticò, Ilaria Lania, Maria Rita Basile, Giuseppe Chidichimo, Silvia Mazzuca"

**Supplementary table 6b.** KEGG enrichment analysis of DAPs in leaves of *Lactuca sativa* seedlings after treatment with FCA

| Query                                | KO     | Definition                                                                                                  |
|--------------------------------------|--------|-------------------------------------------------------------------------------------------------------------|
| tr A0A2J6KJN7 A0A2J6KJN7_LACSA (496) | K02112 | ATPF1B, atpD; F-type H <sup>+</sup> /Na <sup>+</sup> -transporting ATPase subunit beta [EC:7.1.2.2 7.2.2.1] |
| tr A0A2J6KR38 A0A2J6KR38_LACSA (484) | K01601 | rbcl, cbbL; ribulose-bisphosphate carboxylase large chain [EC:4.1.1.39]                                     |
| tr A0A2J6K870 A0A2J6K870_LACSA (648) | K02132 | ATPeF1A, ATP5A1, ATP1; F-type H <sup>+</sup> -transporting ATPase subunit alpha                             |
| tr A0A2J6KSN5 A0A2J6KSN5_LACSA (609) |        |                                                                                                             |
| tr A0A2J6KR44 A0A2J6KR44_LACSA (329) | K02716 | psbO; photosystem II oxygen-evolving enhancer protein 1                                                     |
| tr A0A2J6KNE7 A0A2J6KNE7_LACSA (949) | K08675 | PRSS15, PIM1; ATP-dependent Lon protease [EC:3.4.21.53]                                                     |
| tr A0A2J6KM75 A0A2J6KM75_LACSA (377) | K00847 | E2.7.1.4, scrK; fructokinase [EC:2.7.1.4]                                                                   |
| tr A0A2J6KKS5 A0A2J6KKS5_LACSA (955) | K01535 | PMA1, PMA2; H <sup>+</sup> -transporting ATPase [EC:7.1.2.1]                                                |
| tr A0A2J6KC04 A0A2J6KC04_LACSA (328) | K00025 | MDH1; malate dehydrogenase [EC:1.1.1.37]                                                                    |
| tr A0A2J6JYJ9 A0A2J6JYJ9_LACSA (221) | K02995 | RP-S8e, RPS8; small subunit ribosomal protein S8e                                                           |

|                                       |        |                                                                                   |
|---------------------------------------|--------|-----------------------------------------------------------------------------------|
| tr A0A2J6M0L9 A0A2J6M0L9_LACSA (647)  | K03283 | HSPA1s; heat shock 70kDa protein 1/2/6/8                                          |
| tr A0A2J6LQR8 A0A2J6LQR8_LACSA (450)  | K07374 | TUBA; tubulin alpha                                                               |
| tr A0A2J6K4N9 A0A2J6K4N9_LACSA (233)  | K02934 | RP-L6e, RPL6; large subunit ribosomal protein L6e                                 |
| tr A0A2J6K1M5 A0A2J6K1M5_LACSA (1252) |        |                                                                                   |
| tr A0A2J6K1D0 A0A2J6K1D0_LACSA (813)  |        |                                                                                   |
| tr A0A2J6JZ15 A0A2J6JZ15_LACSA (382)  |        |                                                                                   |
| tr A0A2J6JZ00 A0A2J6JZ00_LACSA (471)  |        |                                                                                   |
| tr A0A2J6K6R8 A0A2J6K6R8_LACSA (431)  | K11340 | ACTL6A, INO80K; actin-like protein 6A                                             |
| tr A0A2J6JYV6 A0A2J6JYV6_LACSA (843)  | K03234 | EEF2; elongation factor 2                                                         |
| tr A0A2J6LKC2 A0A2J6LKC2_LACSA (190)  | K11254 | H4; histone H4                                                                    |
| tr A0A2J6JPA2 A0A2J6JPA2_LACSA (203)  | K12876 | RBM8A, Y14; RNA-binding protein 8A                                                |
| tr A0A2J6MF89 A0A2J6MF89_LACSA (99)   | K02692 | psaD; photosystem I subunit II                                                    |
| tr A0A2J6JN28 A0A2J6JN28_LACSA (777)  | K19984 | EXOC5, SEC10; exocyst complex component 5                                         |
| tr A0A2J6K212 A0A2J6K212_LACSA (266)  | K08912 | LHCB1; light-harvesting complex II chlorophyll a/b binding protein 1              |
| tr A0A2J6JGN9 A0A2J6JGN9_LACSA (1409) | K15601 | KDM3; [histone H3]-dimethyl-L-lysine9 demethylase [EC:1.14.11.65]                 |
| tr A0A2J6M6Y2 A0A2J6M6Y2_LACSA (218)  | K03564 | BCP, PRXQ, DOT5; thioredoxin-dependent peroxiredoxin [EC:1.11.1.24]               |
| tr A0A2J6M0G5 A0A2J6M0G5_LACSA (523)  |        |                                                                                   |
| tr A0A2J6MHG7 A0A2J6MHG7_LACSA (464)  | K01369 | LGMN; legumain [EC:3.4.22.34]                                                     |
| tr A0A2J6LS26 A0A2J6LS26_LACSA (1150) | K03021 | RPC2, POLR3B; DNA-directed RNA polymerase III subunit RPC2 [EC:2.7.7.6]           |
| tr A0A2J6KRH0 A0A2J6KRH0_LACSA (403)  | K02930 | RP-L4e, RPL4; large subunit ribosomal protein L4e                                 |
| tr A0A2J6MHA8 A0A2J6MHA8_LACSA (957)  | K10405 | KIFC1; kinesin family member C1                                                   |
| tr A0A2J6LNZ7 A0A2J6LNZ7_LACSA (437)  | K01438 | argE; acetylornithine deacetylase [EC:3.5.1.16]                                   |
| tr A0A2J6LI76 A0A2J6LI76_LACSA (623)  | K02145 | ATPeV1A, ATP6A; V-type H <sup>+</sup> -transporting ATPase subunit A [EC:7.1.2.2] |
| tr A0A2J6LHJ7 A0A2J6LHJ7_LACSA (389)  | K00218 | por; protochlorophyllide reductase [EC:1.3.1.33]                                  |
| tr A0A2J6K7V0 A0A2J6K7V0_LACSA (477)  |        |                                                                                   |
| tr A0A2J6MJP6 A0A2J6MJP6_LACSA (635)  | K08991 | MUS81; crossover junction endonuclease MUS81 [EC:3.1.22.-]                        |
| tr A0A2J6LDW8 A0A2J6LDW8_LACSA (249)  | K02991 | RP-S6e, RPS6; small subunit ribosomal protein S6e                                 |



|                                       |        |                                                                                                              |
|---------------------------------------|--------|--------------------------------------------------------------------------------------------------------------|
| tr A0A2J6LC77 A0A2J6LC77_LACSA (1974) | K02349 | POLQ; DNA polymerase theta [EC:2.7.7.7]                                                                      |
| tr A0A2J6LC09 A0A2J6LC09_LACSA (622)  | K17681 | ATAD3A_B; ATPase family AAA domain-containing protein 3A/B                                                   |
| tr A0A2J6LBI7 A0A2J6LBI7_LACSA (404)  | K01623 | ALDO; fructose-bisphosphate aldolase, class I [EC:4.1.2.13]                                                  |
| tr A0A2J6LBG3 A0A2J6LBG3_LACSA (894)  | K03696 | clpC; ATP-dependent Clp protease ATP-binding subunit ClpC                                                    |
| tr A0A2J6JY99 A0A2J6JY99_LACSA (249)  | K08909 | LHCA3; light-harvesting complex I chlorophyll a/b binding protein 3                                          |
| tr A0A2J6JLK0 A0A2J6JLK0_LACSA (449)  | K03231 | EEF1A; elongation factor 1-alpha                                                                             |
| tr A0A2J6L776 A0A2J6L776_LACSA (511)  | K18757 | LARP1; la-related protein 1                                                                                  |
| tr A0A2J6L5J6 A0A2J6L5J6_LACSA (1093) | K11838 | USP7, UBP15; ubiquitin carboxyl-terminal hydrolase 7 [EC:3.4.19.12]                                          |
| tr A0A2J6L1L3 A0A2J6L1L3_LACSA (177)  | K01602 | rbcS, cbbS; ribulose-bisphosphate carboxylase small chain [EC:4.1.1.39]                                      |
| tr A0A2J6L042 A0A2J6L042_LACSA (479)  |        |                                                                                                              |
| tr A0A2J6KTT7 A0A2J6KTT7_LACSA (552)  | K02147 | ATPeV1B, ATP6B; V-type H <sup>+</sup> -transporting ATPase subunit B                                         |
| tr A0A2J6MCD9 A0A2J6MCD9_LACSA (508)  | K02111 | ATPF1A, atpA; F-type H <sup>+</sup> /Na <sup>+</sup> -transporting ATPase subunit alpha [EC:7.1.2.2 7.2.2.1] |
